1 **Effects of mutating  $\alpha$ -tubulin lysine 40 on sensory dendrite**  
2 **development**

3

4

5 Brian V. Jenkins<sup>1\*</sup>, Harriet A. J. Saunders<sup>1,2</sup>, Helena L. Record<sup>1</sup>, Dena M. Johnson-  
6 Schlitz<sup>1</sup>, Jill Wildonger<sup>1,‡</sup>

7

8 <sup>1</sup>Biochemistry Department, University of Wisconsin-Madison, Madison, WI, 53706 USA

9 <sup>2</sup>Integrated Program in Biochemistry, University of Wisconsin-Madison, Madison, WI,  
10 53706 USA

11

12

13 \*Current address: Jungers Center for Neurosciences Research, Oregon Health and  
14 Science University, Portland, OR, 97239

15

16 ‡Author for correspondence (wildonger@wisc.edu)

17

18

19

20 Keywords (3-6): microtubule, acetylation, neuron, dendrite, Drosophila

21

22 *running title: K40 mutations alter dendrite remodeling*

23

24

25

26 Summary Statement: Neurons are enriched in post-translationally modified  
27 microtubules. Targeted mutagenesis of endogenous  $\alpha$ -tubulin in flies reveals that  
28 dendrite branch refinement is altered by acetylation-blocking mutations.

29 **ABSTRACT**

30

31 Microtubules are essential to neuronal structure and function. Axonal and dendritic  
32 microtubules are enriched in post-translational modifications that impact microtubule  
33 dynamics, transport, and microtubule-associated proteins. Acetylation of  $\alpha$ -tubulin lysine  
34 40 (K40) is a prominent, conserved modification of neuronal microtubules. However, the  
35 cellular role of microtubule acetylation remains controversial. To resolve how  
36 microtubule acetylation might affect neuronal morphogenesis we mutated endogenous  
37  $\alpha$ -tubulin in vivo using a new fly strain that facilitates the rapid knock-in of designer  $\alpha$ -  
38 *tubulin* alleles. Leveraging our new strain, we found that microtubule acetylation, as well  
39 as polyglutamylation and (de)tyrosination, is not essential for survival. However, we  
40 found that dendrite branch refinement in sensory neurons relies on  $\alpha$ -tubulin K40.  
41 Mutagenesis of K40 reveals moderate yet significant changes in dendritic lysosome  
42 transport, microtubule polymerization, and Futsch distribution in dendrites but not  
43 axons. Our studies point to an unappreciated role for  $\alpha$ -tubulin K40 and acetylation in  
44 dendrite morphogenesis. While our results are consistent with the idea that microtubule  
45 acetylation patterns microtubule function within neurons, they also suggest there may  
46 be a structural requirement for  $\alpha$ -tubulin K40.

## 47 INTRODUCTION

48

49 Microtubules provide the basis for neuronal architecture. The ability of neurons to  
50 transmit and receive signals depends on the proper morphogenesis of axons and  
51 dendrites. Axons and dendrites differ in structure as well as function. Microtubules in  
52 each compartment are uniquely organized and enriched in post-translational  
53 modifications (PTMs), including acetylation, deetyrosination, and polyglutamylation  
54 (Chakraborti et al., 2016; Song and Brady, 2015). The patterns of microtubule PTMs  
55 between and within axons and dendrites are thought to be critical to functional  
56 compartmentalization by locally regulating microtubule dynamics and/or transport. Yet  
57 the role that microtubule PTMs, in particular acetylation, may play in neuronal  
58 morphogenesis has been controversial.

59

60 Several conserved lysines in  $\alpha$ - and  $\beta$ -tubulin are acetylated, and acetylation of the  $\alpha$ -  
61 tubulin luminal residue lysine 40 (K40) has been the most well-studied since its  
62 discovery over thirty years ago (Choudhary et al., 2009; Chu et al., 2011; Howes et al.,  
63 2014; L'Hernault and Rosenbaum, 1983; L'Hernault and Rosenbaum, 1985; Soppina et  
64 al., 2012). Acetylation of  $\alpha$ -tubulin K40 was initially characterized as a marker of  
65 microtubules resistant to depolymerizing drugs (Piperno et al., 1987). Although  
66 acetylation typically correlates with stable, long-lived microtubules in cells, acetylation  
67 itself does not confer stability, but rather may make microtubules more resilient to  
68 mechanical forces as microtubules age (Coombes et al., 2016; Howes et al., 2014; Ly et  
69 al., 2016; Palazzo et al., 2003; Portran et al., 2017; Szyk et al., 2014; Webster and  
70 Borisy, 1989; Wilson and Forer, 1997; Xu et al., 2017). Yet despite years of study, the  
71 effects of acetylation on microtubules and microtubule function in cells are still debated.

72

73 In cultured mammalian neurons, young axons are enriched in acetylated microtubules in  
74 comparison to dendrites. This difference initially led to the idea that acetylation might  
75 label microtubule tracks for selective transport to one compartment or the other (Song  
76 and Brady, 2015). Consistent with this idea, acetylation has been shown to distinguish  
77 the microtubule tracks that are preferentially bound by kinesin-1, which transports cargo

78 from the cell body to axon terminal (Dompierre et al., 2007; Guardia et al., 2016). The  
79 neuron-wide expression of  $\alpha$ -tubulin K40Q, which mimics acetylation, has also been  
80 reported to redirect kinesin-1 to dendrites (Farias et al., 2015). Similarly, in immature  
81 unpolarized neurons, increasing microtubule acetylation redirects kinesin-1 to multiple  
82 neurites (Hammond et al., 2010; Reed et al., 2006). However, in mature polarized  
83 neurons, microtubule acetylation by itself is not sufficient to alter kinesin-1 localization  
84 (Cai et al., 2009; Hammond et al., 2010). Also, microtubule acetylation does not affect  
85 kinesin-1 motility in purified in vitro systems (Kaul et al., 2014; Walter et al., 2012).  
86 Thus, there are conflicting reports about whether microtubule acetylation is necessary  
87 and/or sufficient to affect motor activity and localization in neurons.

88  
89 There is also conflicting evidence regarding the role of microtubule acetylation in  
90 neuronal development. The function of microtubule acetylation in the developing  
91 nervous system has been investigated mainly through the loss or over-expression of the  
92 primary  $\alpha$ -tubulin acetyltransferase and deacetylase enzymes,  $\alpha$ TAT1 and HDAC6,  
93 respectively (Akella et al., 2010; Hubbert et al., 2002; Shida et al., 2010). On one hand,  
94 there are reports that inhibiting HDAC6 disrupts axon initial segment formation in  
95 cultured neurons (Tapia et al., 2010; Tsushima et al., 2015), and that cortical neuron  
96 migration is impeded by either the knock-down of  $\alpha$ TAT1 or the over-expression of  $\alpha$ -  
97 tubulin K40A, which cannot be acetylated (Creppe et al., 2009; Li et al., 2012). On the  
98 other hand, *HDAC6* and  *$\alpha$ TAT1* knock-out mice are homozygous viable. Neither knock-  
99 out results in any gross neurological defect, such as a disruption in cortical layering, that  
100 is typically associated with abnormal neuronal polarity (Kalebic et al., 2013; Kim et al.,  
101 2013; Zhang et al., 2008). Worms lacking  $\alpha$ TAT1 activity are viable, but touch  
102 insensitive (Akella et al., 2010; Cueva et al., 2012; Shida et al., 2010; Topalidou et al.,  
103 2012; Zhang et al., 2002). A recent study has shown that  *$\alpha$ TAT1* knock-out mice are  
104 also insensitive to mechanical touch and pain (Morley et al., 2016), indicating that the  
105 functional effects of microtubule acetylation are likely conserved between invertebrates  
106 and vertebrates. These functional studies raise the question of whether and how  
107 microtubule acetylation might sculpt neuronal architecture. Here again, there is  
108 conflicting evidence arguing both for and against the importance of acetylated

109 microtubules to axonal morphology (Morley et al., 2016; Neumann and Hilliard, 2014). It  
110 is not known whether only axons rely on acetylated microtubules; indeed, a potential  
111 role for microtubule acetylation in dendrite morphogenesis has not been explored.

112

113 We sought to resolve the role of microtubule acetylation in neuronal transport and  
114 morphogenesis through targeted mutagenesis of endogenous  $\alpha$ -tubulin in *Drosophila*. A  
115 key advantage of mutating endogenous  $\alpha$ -tubulin is that we can directly and specifically  
116 assess the involvement of  $\alpha$ -tubulin residues in the development of axons and dendrites  
117 as well as microtubule growth and microtubule-dependent activities. Our approach  
118 leverages a new fruit fly strain that we created to enable the rapid knock-in of designer  
119  *$\alpha$ -tubulin* alleles. By directly targeting the  $\alpha$ -tubulin residues that are modified, we avoid  
120 complications often associated with targeting the modifying enzymes. For example,  
121 several modifying enzymes have cellular targets in addition to tubulin. While this is not  
122 the case for  $\alpha$ TAT1, which acetylates itself and  $\alpha$ -tubulin K40, HDAC6 deacetylates  
123 multiple proteins in addition to  $\alpha$ -tubulin (Valenzuela-Fernandez et al., 2008). Some  
124 enzymes, such as polyglutamylases, can modify several tubulin residues and some  
125 modifying enzymes, such as the carboxypeptidase that removes the terminal tyrosine  
126 on  $\alpha$ -tubulin, remain unidentified (Janke, 2014; Song and Brady, 2015). This presents  
127 challenges to using an enzyme-based approach to dissect the role of microtubule PTMs  
128 in cells.

129

130 Through live imaging of sensory neurons in developing fruit flies, we found that targeted  
131 mutagenesis of endogenous  $\alpha$ -tubulin K40 does not disrupt selective transport to axons  
132 or dendrites, or neuronal polarity, but does affect the refinement of dendrite branches.  
133 Acetylation-blocking mutations increase branch number with a correlative increase in  
134 terminal branch growth. Both  $\alpha$ -tubulin K40A and K40R mutations block acetylation.  
135 However, only the arginine substitution conserves the length and charge of the lysine  
136 sidechain; alanine does not and thus may alter  $\alpha$ -tubulin structure. We found that the  
137 K40R mutation does not phenocopy the effects of the K40A mutation on dendrite  
138 dynamics, suggesting that K40 may be essential for  $\alpha$ -tubulin and/or microtubule

139 structure. In the  $\alpha$ -tubulin K40A mutant dendrites we observed modest yet significant  
140 changes in lysosome transport, microtubule growth, and Futsch distribution that might  
141 underlie an increase in branch number. Combined, our data point to a previously  
142 unappreciated role for K40 and acetylation in fine-tuning dendrite patterning.

## 143 RESULTS

144

### 145 Characterization of $\alpha$ -tubulin mutations that disrupt microtubule PTMs

146

147 To determine the function of microtubule PTMs in neurons *in vivo*, we undertook  
148 targeted mutagenesis of  $\alpha$ -tubulin in fruit flies. Like other organisms, the *Drosophila*  
149 *melanogaster* genome has several distinct  $\alpha$ -tubulin genes that encode unique protein  
150 isoforms, which assemble into microtubules that are modified. The four *Drosophila*  $\alpha$ -  
151 tubulin genes have been named based on their cytological location:  $\alpha$ Tub84B,  
152  $\alpha$ Tub84D,  $\alpha$ Tub85E, and  $\alpha$ Tub67C (Raff, 1984).  $\alpha$ Tub84B is likely the predominant  $\alpha$ -  
153 tubulin in flies and is 97% identical to human TUBA1A, with only five non-conservative  
154 amino acid differences, four of which are within the C-terminal tail (Fig. 1A). Like  $\alpha$ -  
155 tubulin in other organisms,  $\alpha$ Tub84B is modified at multiple residues (Bobinnec et al.,  
156 1999; Piperno and Fuller, 1985; Warn et al., 1990; Wolf et al., 1988). In the sensory  
157 class IV dendritic arborization (da) neurons that we use as a model, microtubules are  
158 acetylated, polyglutamylated, and tyrosinated (Fig. 1B-F and data not shown). In  
159 embryos, axonal microtubules are heavily acetylated (Fig. 1C,D), consistent with  
160 findings that young axons of mammalian neurons in culture are also enriched in  
161 acetylated microtubules. In mature larval da neurons, microtubule acetylation levels are  
162 equivalent between axons and dendrites (Fig. 1E-F).

163

164 Using a genome-engineering approach, we created a new fly strain that enables us to  
165 readily knock-in designer  $\alpha$ Tub84B alleles via site-directed recombination (Fig. 1G). We  
166 used an ends-out gene targeting strategy (Huang et al., 2009) to replace  $\alpha$ Tub84B with  
167 an *attP* "landing" site. Consistent with previous reports, deleting  $\alpha$ Tub84B resulted in  
168 lethality (Table 1), indicating that  $\alpha$ Tub84B is essential for survival and that the other  $\alpha$ -  
169 tubulin genes could not compensate for its loss (Matthews and Kaufman, 1987). This  
170 includes  $\alpha$ Tub84D, which has a similar expression pattern and encodes a nearly  
171 identical protein that differs from  $\alpha$ Tub84B by two amino acids (Matthews et al., 1989;  
172 Raff, 1984). The knock-out strain was rescued by knocking-in wild-type  $\alpha$ Tub84B

173 ( $\alpha Tub84B^{Kin-WT}$ ), indicating that the *attP* replacement strategy did not disrupt the  
174 function of the  $\alpha Tub84B$  locus (Table 1). To confirm that  $\alpha Tub84B$  is indeed broadly  
175 expressed, including in the nervous system (Raff, 1984), we generated flies that  
176 express GFP-tagged  $\alpha Tub84B$ . As expected, GFP:: $\alpha Tub84B$  was expressed in most  
177 cell types, including neurons (Fig. 1H). In muscles and epithelial cells, GFP:: $\alpha Tub84B$   
178 appeared filamentous, suggesting GFP-tagged tubulin was incorporated into  
179 microtubules (Fig. 1H). However, it should be noted that the *GFP::aTub84B* allele is  
180 dominant male sterile and does not survive in trans to a deletion that removes *aTub84B*.  
181 This suggests that GFP::aTub84B does not function equivalently to the wild-type  
182 untagged protein. Thus, we have created a unique and powerful tool to manipulate and  
183 visualize endogenous  $\alpha$ -tubulin *in vivo*.

184  
185 We targeted K40 acetylation as well as two additional  $\alpha$ -tubulin modifications that have  
186 also been implicated in neuronal development and transport, namely polyglutamylation  
187 and detyrosination of the C-terminal tail. Many of the studies on microtubule  
188 polyglutamylation and (de)tyrosination have been carried out in vertebrate models. The  
189 fly and mammalian C-terminal tails differ in several amino acids, including several  
190 glutamate residues that are sites of polyglutamylation (Fig. 1A). We tested whether the  
191 function of the  $\alpha$ -tubulin C-terminal tails from these different species might be conserved  
192 despite the sequence differences. Replacing the  $\alpha Tub84B$  C-terminal tail with that of the  
193 mammalian Tuba1a did not affect viability (Table 1), indicating the mammalian Tuba1a  
194 C-terminal tail can functionally substitute for the fly  $\alpha Tub84B$  C-terminal tail (Fig. 1A).  
195 Deletion of the C-terminal tail resulted in lethality (Table 1), indicating that the C-  
196 terminal tail is essential for proper  $\alpha$ -tubulin function *in vivo*. Blocking two different  
197 modifications of the C-terminal tail, polyglutamylation ( $\alpha Tub84B^{AAAA}$ ) and detyrosination-  
198 tyrosination ( $\alpha Tub84B^{43}$ ), did not affect animal survival (Table 1). Since the glutamates  
199 in the C-terminal tail are thought to mediate interactions with essential motors and other  
200 microtubule-binding proteins, it was particularly surprising that eliminating virtually all  
201 the negatively charged residues in  $\alpha Tub84B^{AAAA}$  did not affect viability (Bonnet et al.,  
202 2001; Boucher et al., 1994; Lacroix et al., 2010; Larcher et al., 1996; Roll-Mecak, 2015;



203 Sirajuddin et al., 2014; Valenstein and Roll-Mecak, 2016; Wang and Sheetz, 2000).  
204 Combined, our results suggest that the C-terminal tail has a conserved role in  $\alpha$ -tubulin  
205 function *in vivo*, yet polyglutamylation and modification of the terminal residues of the C-  
206 terminal tail are dispensable for survival.

207  
208 To test the role of  $\alpha$ Tub84B K40 acetylation in survival and neuronal morphogenesis we  
209 introduced K40A and K40R mutations to eliminate acetylation. Both  $\alpha$ Tub84B alleles  
210 were viable and fertile in trans to the  $\alpha$ Tub84B knock-out (Table 1), consistent with  
211 reports that loss of K40 acetylation does not affect survival (Akella et al., 2010; Cueva et  
212 al., 2012; Kalebic et al., 2013; Kim et al., 2013; Mao et al., 2017; Shida et al., 2010;  
213 Topalidou et al., 2012; Zhang et al., 2008). Our viability and fertility results agree with a  
214 recent study that used CRISPR-Cas9 to introduce the K40R mutation into  $\alpha$ Tub84B  
215 (Mao et al., 2017). Western blot analysis of adult fly head lysate revealed that the  
216 amounts of the mutant  $\alpha$ Tub84B proteins were equivalent to wild-type and that  $\alpha$ -tubulin  
217 K40 acetylation was virtually abolished in the  $\alpha$ Tub84B<sup>K40A</sup> flies (Fig. 1I,J). The residual  
218 signal in the western blot may reflect acetylation of another  $\alpha$ -tubulin isotype, most likely  
219  $\alpha$ Tub84D, which is also broadly expressed (Raff, 1984). We used CRISPR-Cas9  
220 genome editing to delete the entire  $\alpha$ Tub84D gene in the  $\alpha$ Tub84B<sup>K40A</sup> strain. The  
221  $\alpha$ Tub84B<sup>K40A</sup>  $\alpha$ Tub84D<sup>KO</sup> double mutant eliminated the residual acetylated tubulin  
222 signal in western blots (Fig. 1J) and was viable in trans to a large deletion that removes  
223 both  $\alpha$ -tubulin genes (Table 1). Genetic complementation tests also unexpectedly  
224 revealed that  $\alpha$ Tub84D is a non-essential gene (Table 1). Combined, these data  
225 indicate  $\alpha$ -tubulin K40 acetylation is not essential for survival.

226  
227  **$\alpha$ Tub84B K40A does not affect selective transport to axons, but has a**  
228 **compartment-specific effect on retrograde lysosome transport in dendrites**

229  
230 Microtubule acetylation has been shown to affect microtubule-based transport in  
231 cultured cells, including neurons (Dompierre et al., 2007; Reed et al., 2006). One recent  
232 model suggests that acetylated microtubules are part of an exclusion zone that prevents

233 dendritic cargos from entering axons (Farias et al., 2015). Yet there is also evidence  
234 that microtubule acetylation alone is not sufficient to direct motors to a specific  
235 compartment (Atherton et al., 2013). The class IV da neurons that we use as a model  
236 reside just below the transparent larval cuticle, allowing for live imaging of transport in  
237 neurons in intact animals. First, we examined the distribution of a polarized organelle  
238 population, Golgi outposts, which localize to dendrites and regulate dendrite patterning  
239 in flies and mammals (Horton and Ehlers, 2003; Horton et al., 2005; Ye et al., 2007).  
240 We found that the polarized dendritic localization of Golgi outposts was not altered in  
241  $\alpha Tub84B^{K40A}$  neurons (Fig. 2A-B'''). Thus, microtubule acetylation is not an essential  
242 part of the mechanism that prevents Golgi outposts from entering axons.

243  
244 Although selective transport to dendrites or axons is not perturbed, it is possible that  
245 microtubule acetylation affects other aspects of microtubule-based transport. The  
246 trafficking of lysosomes, an organelle component of the autophagy pathway, is sensitive  
247 to microtubule acetylation in cultured cells (Chauhan et al., 2015; Guardia et al., 2016;  
248 Xie et al., 2010). Notably, a recent study revealed that microtubule acetylation  
249 distinguishes a set of tracks that are preferentially used by kinesin-1 to transport  
250 lysosomes in the perinuclear region in HeLa cells (Guardia et al., 2016). We expressed  
251 the lysosome marker Lamp1::GFP in the da neurons and analyzed its dynamic  
252 localization in the axons and dendrites of control and  $\alpha Tub84B^{K40A}$  neurons. In  
253  $\alpha Tub84B^{K40A}$  dendrites, the velocity of lysosomes traveling retrogradely was  
254 significantly reduced while their flux nearly doubled (Fig. 2C,D). Lysosomes moving  
255 anterogradely in  $\alpha Tub84B^{K40A}$  dendrites were not affected (Fig. 2D). Since microtubules  
256 in da neuron dendrites are oriented predominantly minus-end-distal (Rolls et al., 2007),  
257 lysosomes moving anterogradely are likely transported by dynein whereas those that  
258 move retrogradely are likely transported by kinesin. In contrast, lysosome transport in  
259 axons was unchanged in the  $\alpha Tub84B^{K40A}$  neurons (Fig. 2E). Our data indicate that the  
260  $\alpha Tub84B$  K40A mutation selectively alters the retrograde, likely kinesin-mediated,  
261 transport of lysosomes in dendrites, but does not affect either the retrograde or  
262 anterograde transport of lysosomes in axons. While the  $\alpha Tub84B$  K40A mutation does  
263 not affect selective transport to axons or dendrites, it does have a dendrite-specific

264 effect on lysosome transport.

265

## 266 **$\alpha$ Tub84B K40A and K40R mutations increase dendrite branch number**

267

268 The axons of young neurons in culture are enriched in acetylated microtubules relative  
269 to dendrites (Song and Brady, 2015), which has led to a focus on the role of microtubule  
270 acetylation in axons. However, our analyses of lysosome transport in  $\alpha$ Tub84B<sup>K40A</sup>  
271 neurons suggest that dendritic, not axonal, microtubules are sensitive to  $\alpha$ -tubulin K40  
272 mutagenesis. We next tested whether dendrite morphogenesis is affected by K40  
273 mutations. In developing larvae, the class IV da neurons extend an expansive dendritic  
274 arbor over a shallow depth, making them ideal for analyzing dendrite growth and  
275 patterning (Grueber et al., 2002). Acetylated microtubules are present in the main  
276 dendrite branches and a subset of terminal branches of class IV da neurons (Fig. 3A).  
277 To visualize dendrite arbors and quantify dendrite branching in control and  $\alpha$ Tub84B  
278 K40 mutants, we used the transgene *ppk-CD4::GFP*, which expresses a GFP-tagged  
279 transmembrane protein (CD4) under the control of the class IV-specific *pickpocket* (*ppk*)  
280 enhancer. The overall dendritic coverage of the  $\alpha$ Tub84B<sup>K40A</sup> and  $\alpha$ Tub84B<sup>K40R</sup> neurons  
281 appears normal in that the mutant arbors extended to the segment boundaries normally  
282 and tiled properly with their neighbors. However, our quantification of dendrite tips  
283 revealed that both the K40A and K40R mutations resulted in an increased number of  
284 terminal branches compared to age-matched wild-type controls at 120 hours (h) after  
285 egg laying (AEL) (Fig. 3B-E). We did not detect any defects in axon termination in the  
286 ventral nerve cord (data not shown).

287

## 288 **Dendrite branch growth is increased in $\alpha$ Tub84B K40A mutant neurons**

289

290 The class IV da neuron dendrites initially extend during late embryonic stages and  
291 continue to grow throughout larval stages. Dendrite branches undergo remodeling and  
292 refinement through bouts of de novo growth, extension and retraction as larvae grow in  
293 size (Parrish et al., 2009; Stewart et al., 2012). During early larval stages (48 h AEL at  
294 the beginning of the 2<sup>nd</sup> larval instar), terminal branches are dynamic and new branches

295 are added to the arbor whereas during late larval stages, terminal branches are less  
296 dynamic and fewer new branches appear. At 48 h AEL both K40A and K40R mutant  
297 neurons had the same number of dendrite tips as control neurons (Fig. 3B-E), indicating  
298 that the increase in dendrite tip number was likely not due to a defect in initial stages of  
299 dendrite extension during embryonic stages. Rather, we reasoned that the increase in  
300 terminal dendrites might have resulted from changes in dendrite dynamics during early  
301 larval stages. To test whether dendrite tip number increased due to increased branch  
302 growth and/or decreased branch retraction, we used time-lapse imaging to record  
303 dendrite dynamics in 48 h AEL larvae. We then quantified the number of dendrite tips  
304 that formed de novo, extended or retracted over a 15-minute interval (Fig. 4A). In the  
305  $\alpha Tub84B^{K40A}$  neurons, significantly more branches extended compared to controls,  
306 albeit de novo branch growth did not significantly increase over this time interval (Fig. 4  
307 B-D). While  $\alpha Tub84B^{K40R}$  mutant neurons had an increased number of dendrite tips like  
308  $\alpha Tub84B^{K40A}$ , neither dendrite growth nor retraction was significantly altered (Fig. 4B-  
309 D). This suggests the increase in dendrite tips in the  $\alpha Tub84B^{K40A}$  arbors is likely due to  
310 an increase in dendrite growth. Moreover, the difference between dendrite dynamics in  
311 the  $\alpha Tub84B$  K40A versus K40R mutant neurons suggests that K40 may be structurally  
312 important for  $\alpha$ -tubulin and/or microtubule function in neurons.

313

### 314 **Dendritic microtubule polymerization frequency is reduced by $\alpha Tub84B$ K40A**

315

316 Next, we analyzed whether the increase in dendrite growth in the  $\alpha Tub84B$  K40A  
317 mutants might reflect a change in the growth of the microtubules themselves. We  
318 focused on the  $\alpha Tub84B$  K40A mutant as it resulted in significantly altered dynamic  
319 dendrite growth. Although acetylation does not affect microtubule polymerization in vitro  
320 (Dompierre et al., 2007; Howes et al., 2014; Maruta et al., 1986), we nonetheless tested  
321 this possibility since microtubule growth has been previously correlated with terminal  
322 branch growth in da neurons (Ori-McKenney et al., 2012; Sears and Broihier, 2016;  
323 Yalgin et al., 2015). Based on these reports, we predicted that the increase in terminal  
324 branch growth in the  $\alpha Tub84B$  K40 mutants might correlate with an increase in

325 microtubule growth. To monitor microtubule growth we used EB1::GFP, which  
326 associates with the plus-ends of growing microtubules in neurites (Fig. 5A). Our data  
327 reveal that the  $\alpha$ Tub84B K40A mutation resulted in a reduced number of EB1::GFP  
328 comets specifically in dendrites (Fig. 5B,C) demonstrating that blocking K40 acetylation  
329 affected the polymerization of dendritic, but not axonal, microtubules. The rate at which  
330 microtubules polymerized was not affected by the K40A mutation (control dendrites:  
331  $0.123 \pm 0.028 \mu\text{m min}^{-1}$ ,  $n=25$ , and  $\alpha$ Tub84B<sup>K40A</sup> dendrites:  $0.113 \pm 0.029 \mu\text{m min}^{-1}$ ,  
332  $n=30$ ,  $p = 0.19$ ). Thus, similar to its effect on lysosomes, the  $\alpha$ Tub84B K40A mutation  
333 had a compartment-specific effect on microtubule polymerization.

334

### 335 **Proximal-distal gradient of Futsch in dendrites is disrupted by $\alpha$ Tub84B K40A**

336

337 We next considered whether mutating K40 might affect dendrite branch growth via an  
338 effect on microtubule associated proteins (MAPs), which are also known to regulate  
339 dendrite branch growth (Conde and Caceres, 2009). Microtubule acetylation might  
340 impact the activity and/or distribution of a MAP that is important for proper dendrite  
341 branching. We initially tested whether loss of microtubule acetylation disrupts  
342 microtubule severing by katanin. Katanin has been previously shown to be sensitive to  
343 microtubule acetylation levels in dendrites (Sudo and Baas, 2010). However, we found  
344 that the loss of  $\alpha$ Tub84B K40 acetylation neither blocks nor enhances katanin-induced  
345 changes in dendrite morphogenesis (Fig. S1). This is consistent with a recent report that  
346 modulating HDAC6 levels does not affect katanin-induced dendrite growth defects (Mao  
347 et al., 2014).

348

349 We next turned to Futsch, the fly homolog of MAP1B, which has been shown to regulate  
350 dendrite branching (Sears and Broihier, 2016; Yalgin et al., 2015) and has a similar  
351 distribution pattern as acetylated microtubules in dendrites (Fig. 6A, Fig. 1E,E' and  
352 (Grueber et al., 2002; Jinushi-Nakao et al., 2007). We asked whether the distribution of  
353 Futsch might be affected by the acetylation-blocking K40A mutation. Consistent with  
354 previous reports (Grueber et al., 2002; Jinushi-Nakao et al., 2007), in wild-type control  
355 neurons we found that Futsch was enriched in the main dendrite branches and

356 decreased towards the dendrite tips, where it was detected in some, but not all, terminal  
357 branches (Fig. 6A). In control dendrites, Futsch levels decayed ~ 70% from the cell  
358 body to distal dendrite tip (Fig. 6B). In  $\alpha Tub84B^{K40A}$  neurons, the proximal-medial  
359 dendrite segments showed a significant decrease in Futsch, but Futsch levels were  
360 comparable to control dendrites in the medial-distal segments (Fig. 6B). Futsch levels in  
361 control and  $\alpha Tub84B^{K40A}$  axons were equivalent (Fig. 6B). While decreased Futsch has  
362 been shown to increase dendrite branch number in one study (Yalgin et al., 2015),  
363 another study has found the opposite (Sears and Broihier, 2016). In agreement with the  
364 first study, we found that the reduction of Futsch in a *futsch* hypomorph (*futsch<sup>K68</sup>*)  
365 increased dendrite branch number (Fig. 6C-E). Combined, our results suggest a model  
366 in which a change in Futsch distribution in the dendrite arbor may contribute to the  
367 increase in dendrite tips in the  $\alpha Tub84B^{K40A}$  neurons.  
368

## 369 DISCUSSION

370

371 Acetylation of  $\alpha$ -tubulin K40 is a highly conserved and well-studied microtubule  
372 modification. While acetylated microtubules have been shown to mediate touch  
373 sensation in invertebrates and vertebrates (Akella et al., 2010; Cueva et al., 2012;  
374 Morley et al., 2016; Shida et al., 2010; Topalidou et al., 2012; Zhang et al., 2002), a  
375 role, if any, for acetylated microtubules in neuronal morphogenesis has remained  
376 elusive. To investigate how acetylation of  $\alpha$ -tubulin K40 might affect neuronal  
377 development we leveraged our new fly strain, which facilitates the rapid knock-in of  
378 designer  $\alpha$ Tub84B alleles and thus is a versatile tool for interrogating  $\alpha$ -tubulin function  
379 in vivo. Our targeted mutagenesis of endogenous  $\alpha$ Tub84B points to a role for  $\alpha$ -tubulin  
380 K40 acetylation and K40 in refining the terminal dendrite branches of developing  
381 sensory neurons. Although microtubules in young axons of cultured mammalian  
382 neurons are enriched in acetylated microtubules (Song and Brady, 2015), we found that  
383 microtubule acetylation levels are equivalent between axons and dendrites in mature  
384 sensory neurons in vivo. Mutating  $\alpha$ Tub84B K40 does not affect selective transport to  
385 axons or dendrites in these neurons, consistent with previous reports that microtubule  
386 acetylation alone is not sufficient to direct transport to either compartment (Hammond et  
387 al., 2010; Kaul et al., 2014; Witte et al., 2008). Instead, our results show that mutating  
388  $\alpha$ Tub84B K40 alters microtubule growth, lysosome transport, and Futsch levels in  
389 dendrites but not axons. Our findings are consistent with the idea that  $\alpha$ -tubulin K40  
390 may be important for locally and dynamically modulating microtubule function in  
391 neurons.

392

393 Our data suggest that the increase in dendrite tips in the  $\alpha$ Tub84B K40 mutants likely  
394 reflects a change in the refinement of terminal branches that occurs during larval stages  
395 rather than an effect on dendrite outgrowth during embryogenesis. The class IV da  
396 neurons have both microtubule- and actin-rich dendrite branches (Grueber et al., 2002;  
397 Jinushi-Nakao et al., 2007), and our analyses indicate that only a subset of terminal  
398 dendrites contain acetylated microtubules (albeit dendrites with just a few microtubules  
399 might be below our level of detection). It is possible that the effect of mutating K40 on

400 dendrite branching is modest since only a fraction of terminal dendrites contains  
401 microtubules. In contrast, mutations that disrupt the actin cytoskeleton typically produce  
402 striking changes in terminal branching (Ferreira et al., 2014; Jinushi-Nakao et al., 2007;  
403 Lee et al., 2003; Lee et al., 2015; Soba et al., 2015). One model consistent with our  
404 results and the findings of others is that microtubule acetylation fine-tunes the dynamic  
405 remodeling of microtubule-based dendrite branches. Another possibility is that mutating  
406 K40 alters the structure of  $\alpha$ -tubulin in a way that disrupts dendrite branching.

407  
408 Our data show that the  $\alpha$ Tub84B K40A mutation has modest yet significant effects on  
409 lysosome transport, microtubule growth and Futsch distribution in dendrites. While  
410 these changes might all independently contribute to an increase in dendrite branch  
411 number, it is also possible that they are mechanistically linked. We found that retrograde  
412 lysosome flux nearly doubles in  $\alpha$ Tub84B<sup>K40A</sup> dendrites while anterograde lysosome  
413 transport is normal. Studies in fly and mammalian neurons indicate that MAPs, including  
414 Futsch and MAP6, can selectively disrupt anterograde or retrograde transport (Schwenk  
415 et al., 2014; Stephan et al., 2015). Notably, MAP6-regulated retrograde lysosome  
416 transport affects dendrite growth in cultured hippocampal neurons (Schwenk et al.,  
417 2014), which suggests that dendrite branching may be sculpted by the flux of lysosomes  
418 moving to and away from the cell body. It is unclear why lysosome transport,  
419 microtubule growth, and Futsch distribution are not significantly altered in the  
420  $\alpha$ Tub84B<sup>K40A</sup> axons, although compartment-specific differences in microtubule  
421 regulators and/or MAPs might make dendrites more sensitive to the  $\alpha$ Tub84B K40  
422 mutations than axons. It is possible that several microtubule-based activities that  
423 impinge on dendrite branching are affected by mutating  $\alpha$ -tubulin K40.

424  
425 Recent studies suggest that acetylation increases the resiliency of microtubules and  
426 protects them against mechanical breakage (Portran et al., 2017; Xu et al., 2017). The  
427 da neuron dendrites, sandwiched between the larval cuticle and muscles, are potentially  
428 exposed to repeated external and internal mechanical forces. Unacetylated  
429 microtubules in  $\alpha$ Tub84B<sup>K40A</sup> dendrites may be less resilient to mechanical stresses and  
430 thus may contain a higher proportion of damaged and broken microtubules than wild-



431 type neurons. The breakage of unacetylated microtubules in worm neurons lacking  
432  $\alpha$ TAT1 is suppressed by paralyzing the worms (Topalidou et al., 2012). These broken  
433 microtubules are postulated to stimulate neurite branching by promoting microtubule  
434 growth from the broken microtubule ends. A similar mechanism may increase terminal  
435 branching in the  $\alpha$ Tub84B<sup>K40A</sup> dendrites; however, we observe a decrease, not  
436 increase, in microtubule growth frequency. A change in microtubule flexibility and/or  
437 lattice integrity may also affect the binding of MAPs. For example, the MAP doublecortin  
438 preferentially binds curved microtubule segments, which may be prevalent in neurons  
439 with flexible microtubules (Bechstedt et al., 2014). It would be interesting to determine  
440 whether wild-type and  $\alpha$ Tub84B<sup>K40A</sup> dendrites are differentially sensitive to mechanical  
441 force, and whether changes in mechanical stress would modify any of the  $\alpha$ Tub84B<sup>K40A</sup>  
442 phenotypes.

443  
444 An alternative interpretation of our data is that the increase in branch number is not due  
445 specifically to the loss of microtubule acetylation. For example, other modifications of  $\alpha$ -  
446 tubulin K40 have been reported, including methylation by SetD2 (Park et al., 2016).  
447 However, it is not known whether  $\alpha$ -tubulin K40 is methylated or otherwise modified in  
448 neurons. Lysine-to-arginine or -alanine mutations are often used interchangeably to  
449 block acetylation, although some of our results suggest that these mutations may not be  
450 entirely equivalent. This raises the possibility that intact K40 may be important to the  
451 structure of  $\alpha$ -tubulin and/or microtubules in neurons. Consistent with this idea, work in  
452 plants has revealed that plant growth is disrupted by the expression of  $\alpha$ -tubulin with a  
453 K40A, but not K40R, mutation (Xiong et al., 2013).

454  
455 Neuronal microtubules are enriched in other  $\alpha$ -tubulin modifications, including  
456 (de)tyrosination and polyglutamylation, whose roles in neuronal development and  
457 function are still being unraveled. We found that targeted mutagenesis of residues that  
458 are modified in the  $\alpha$ -tubulin C-terminal tail ( $\alpha$ Tub84B  $\Delta$ 3 and AAAA) has no effect on  
459 animal survival. This was somewhat unexpected, given the findings, for example, that  
460 the deetyrosination-tyrosination cycle affects kinesin activity (Sirajuddin et al., 2014) as

461 well as loading dynein onto microtubules (McKenney et al., 2016; Nirschl et al., 2016),  
462 and that the loss of polyglutamylase activity alters synaptic function (Ikegami et al.,  
463 2007). However, it is important to consider that fly and mammalian microtubules may be  
464 differentially enriched in these modifications. An early report suggests that fly  
465 microtubules are only weakly detyrosinated (Warn et al., 1990). Moreover, differences in  
466 the repertoire of modifying enzymes between flies and mammals suggest that PTM  
467 dynamics may differ as well. For example, although fly microtubules are tyrosinated and  
468 detyrosinated, the lack of a known  $\alpha$ -tubulin tyrosine ligase makes it unclear whether  
469 microtubules cycle between these two states in flies.

470

471 Our results are consistent with the possibility that PTMs may function synergistically  
472 rather than independently to regulate microtubule function (Atherton et al., 2013;  
473 Hammond et al., 2010; Kaul et al., 2014). Also, these modifications may be important to  
474 preserving microtubule-based functions in aging neurons given that changes in  
475 acetylation, detyrosination/tyrosination, and polyglutamylation have been implicated in  
476 neurodegeneration (Song and Brady, 2015). In support of this idea, we have found that  
477 adult  *$\alpha$ Tub84B<sup>K40A</sup>* flies display an age-related deficit in righting behavior (H.R., B.V.J.,  
478 J.W., unpublished data). Our current studies are not an exhaustive analysis of all known  
479 modifications of  $\alpha$ -tubulin and microtubules. It will be of great interest to determine  
480 whether combinations of known modifications, or currently uncharacterized  
481 modifications, contribute to creating a polarized neuron. Proteomic studies have  
482 identified additional  $\alpha$ -tubulin lysines that are acetylated (Choudhary et al., 2009; Liu et  
483 al., 2015a; Liu et al., 2015b), raising the possibility that the acetylation of other lysines  
484 might play an essential role in neuronal development.

## 485 MATERIALS AND METHODS

486

### 487 Fly strains

488 The  $\alpha Tub84B^{attP-KO}$  strain was created using an ends-out recombination approach  
489 (Huang et al., 2009). All  $\alpha Tub84B$  knock-in strains were made by using standard  
490 molecular biology methods to modify  $\alpha Tub84B$  in a plasmid containing an *attB* site; the  
491 plasmid with the modified  $\alpha Tub84B$  was then injected into  $\alpha Tub84B^{attP-KO}$  embryos  
492 expressing  $\Phi C31$  by Bestgene Inc (Chino Hills, CA). A fly strain with wild-type  $\alpha Tub84B$   
493 knocked into the locus ( $\alpha Tub84B^{Kin-WT}$ ) rescued the lethality of the  $\alpha Tub84B$  knock-out.  
494  $\alpha$ -tubulin protein levels and dendrite branch number were equivalent between  
495  $\alpha Tub84B^{Kin-WT}$  and wild-type flies. Thus, wild-type flies were used as controls in the  
496 experiments. The following alleles and transgenes were used in this study: *ppk-*  
497 *CD4::tdGFP*, *ppk-CD4::tdTomato*, *ppk-Gal4*, *UAS-Lamp1::GFP* and *Futsch<sup>K68</sup>* (Hummel  
498 et al., 2000) were obtained from the Bloomington Stock Center (Bloomington, IN, USA);  
499 *UAS-EB1::GFP* (Rolls et al., 2007) from M. Rolls (Penn State University, University  
500 Park, PA, USA), and *UAS-katanin-60* (Mao et al., 2014) from S. Jin and Y. Zhang  
501 (Hubei University, Wuhan, Hubei and Chinese Academy of Sciences, Beijing, China,  
502 respectively). *ppk-ManII::GFP* was created by cloning *ManII::GFP* (Ye et al., 2007)  
503 downstream of the *ppk* enhancer in the *pACUH* vector (Addgene, Cambridge, MA); *ppk-*  
504 *ManII::GFP* was integrated at *attP VK00037* by BestGene Inc.

505

### 506 Imaging and analysis

507 Images were acquired on a Leica SP5 laser scanning confocal microscope, equipped  
508 with two standard PMTs and a HyD GaAsP detector, using a 20X 0.7 NA oil immersion  
509 HC PL APO objective or a 40X 1.3 NA oil immersion HCX PL APO objective. Fruit fly  
510 larvae were imaged live in a drop of 50% glycerol (catalog number G153-1, Fisher  
511 Scientific, Hampton, NH) in PBS. The ratio of anti-acetylated microtubules in axons and  
512 dendrites was obtained from class IV ddaC neurons in fixed larval fillets stained with  
513 anti-acetylated tubulin (6-11-B1) and HRP. Acetylated tubulin signal in axons and  
514 dendrites was traced and captured via line scan analysis in ImageJ/FIJI (NIH) and  
515 exported to Excel (Microsoft). Signal normalized to HRP produced a similar ratio. For

516 live neuron imaging, larvae were immobilized during imaging by pressure from a  
517 coverglass secured by two lines of vacuum grease flanking the animal. EB1::GFP and  
518 Lamp1::GFP movies were collected at rates of 1.25 frames per second ( $f s^{-1}$ ) and 0.5  $f$   
519  $s^{-1}$  (EB1::GFP), or 1.51  $f s^{-1}$  (Lamp1::GFP). Kymographs were generated and traced in  
520 Metamorph (Molecular Devices, Sunnyvale, CA), and the data were analyzed in Excel.  
521 Velocity (EB1::GFP, Lamp1) was calculated from the slope of the trajectory traced in  
522 Metamorph. The trajectories of lysosomes that changed speed or direction were  
523 segmented, and the segments were included in the total tallies. Lamp1 flux describes  
524 the number of lysosomes moving within an axon or dendrite segment within an  
525 approximately one-minute-long movie segment. For analyzing Futsch levels in dendrites  
526 and axons, images of neurons in fixed tissue were acquired and then dendrite segments  
527 were traced in ImageJ/FIJI using the CD4::GFP signal as a guide. Data from line scans  
528 of the CD4::GFP and Futsch signals in the proximal axon and dendrite segments were  
529 imported into Excel. We normalized anti-Futsch signal intensity by generating a ratio of  
530 Futsch to CD4::GFP. Since the dendrites included for analysis varied somewhat in  
531 length, we normalized dendrite length by dividing each dendrite into five segments that  
532 represented a percentage of the total dendrite length (e.g. the most proximal segment  
533 represented 0-20% of the total length). Dendrite tips were counted using either Imaris  
534 (automated dendrite tip counting following manual adjustments) or Metamorph (manual  
535 tip marking). Dendrite extension, retraction, and de novo growth were analyzed as  
536 previously described (Soba et al., 2015). Briefly, z-stack images of neurons expressing  
537 CD4::GFP in larvae at 48 h AEL were acquired 15 minutes apart. Maximum projections  
538 of images taken at both time points were aligned in ImageJ using the bUnwarpJ plugin  
539 and then overlaid in Metamorph. The first image ( $t=0$ ) was pseudo-colored red and the  
540 second image ( $t=15$  min) was pseudo-colored green. Overlaid images were manually  
541 scored for red and green tips using Metamorph and Photoshop (Adobe, San Jose, CA),  
542 and data were analyzed in Excel (Microsoft). All data were double-blinded before  
543 analysis and a portion of data sets were analyzed independently by two people to  
544 ensure samples were scored equivalently. Experiments were replicated at least twice.

545

## 546 **Immunohistochemistry**

547 Larvae were dissected in PHEM buffer (80mM PIPES pH6.9, 25mM HEPES pH7.0,  
548 7mM MgCl<sub>2</sub>, 1mM EGTA) and fixed in 4% PFA in 1X PBS with 3.2% sucrose for 45-60  
549 minutes. The fixed fillets were then permeabilized in PBS with 0.3% Triton-X100,  
550 quenched by 50mM NH<sub>4</sub>Cl, and blocked in blocking buffer composed of 2.5% BSA  
551 (Sigma catalog number A9647), 0.25% FSG (Sigma catalog number G7765), 10mM  
552 glycine, 50mM NH<sub>4</sub>Cl, 0.05% Triton-X100. The fillets were incubated with primary  
553 antibodies overnight at 4°C in blocking buffer. Samples were washed extensively in  
554 PBS with 0.1% Triton X100 and then incubated with secondary antibodies in blocking  
555 buffer overnight at 4°C in the dark. After washing, samples were mounted on slides  
556 using elvanol with antifade (polyvinyl alcohol, Tris 8.5, glycerol and DABCO, catalog  
557 number 11247100, Fisher Scientific, Hampton, NH). Embryos were dechorionated in  
558 bleach for 1-2 min, fixed in 4% formaldehyde overlaid with heptane for 20 min, and  
559 devitellinized by rapid passage of embryos through a heptane:methanol interface.  
560 Embryos were incubated with primary antibodies diluted in PBS with 0.1% Triton X100  
561 overnight at 4°C and with secondary antibodies for 2.5 hours at room temperature  
562 (following each antibody incubation step, embryos were washed 3X 20 min with PBS  
563 with 0.1% Triton X100 at room temperature). Antibodies used: anti-acetylated tubulin 6-  
564 11B-1 (1:1000, or 1 µg mL<sup>-1</sup>, catalog number T6793, Sigma-Aldrich, St. Louis, MO),  
565 anti-polyglutamylated tubulin GT335 (1:1000, gift of Carsten Janke), anti-tyrosinated  
566 tubulin YL1/2 (1:250, or 4 µg mL<sup>-1</sup>, AbD Serotec MCA77G, Bio-Rad, Hercules, CA),  
567 anti-Futsch 22C10 (1:50, Developmental Studies Hybridoma Bank, Iowa City, IA), anti-  
568 HRP conjugated Alexa Fluor 647 (1:1000, or 1.4 µg mL<sup>-1</sup>, catalog number 123-605-021,  
569 Jackson ImmunoResearch, West Grove, PA), Dylight 550 anti-mouse (1:1000, or 0.5 µg  
570 mL<sup>-1</sup>, catalog number SA5-10167, ThermoFisher, Waltham, MA),.

571

## 572 **Immunoblotting**

573 For western blot analysis of tubulin expression, 10 fly heads were homogenized in 30 µl  
574 of 1X SDS loading buffer. Lysate from the equivalent of one fly head (3 µl) was loaded  
575 into each lane. Proteins were transferred to PVDF membranes (catalog number 162-  
576 0177, Bio-Rad, Hercules, CA) overnight and the membranes were stained with Ponceau  
577 S (catalog number BP 103-10, Fisher Scientific, Hampton, NH) to check for efficient

578 transfer. Membranes were blocked (5% milk, TBS Tween-20) for 1-2 hours at room  
579 temperature and incubated with primary antibody overnight. After washing, membranes  
580 were incubated with secondary antibody for 2-4 hours at room temperature. The  
581 membranes were then imaged with either chemiluminescence (SuperSignal West Pico,  
582 catalog number 34077, ThermoFisher, Waltham, MA) or fluorescent imaging using an  
583 Odyssey Imaging System (Li-Cor Biosciences, Lincoln, NE). Fluorescence intensity  
584 ratios obtained from the Odyssey were analyzed using FIJI and Excel. Antibodies used:  
585 anti-alpha-tubulin DM1A (1:1000, or  $1 \mu\text{g mL}^{-1}$ , catalog number T6199, Sigma-Aldrich,  
586 St. Louis, MO), anti-acetylated tubulin 6-11B-1 (1:10000, or  $0.1 \mu\text{g mL}^{-1}$ , catalog number  
587 T6793, Sigma-Aldrich, St. Louis, MO), anti-tyrosinated tubulin (1:1000,  $1 \mu\text{g mL}^{-1}$ , AbD  
588 Serotec MCA77G, Bio-Rad, Hercules, CA), anti-polyglutamylated tubulin (1:4000,  
589 catalog number T9822 Sigma-Aldrich, St. Louis, MO), and anti-actin (1:5000, Chemicon  
590 MAB 1501, EMD-Millipore, Billerica, MA).

591

## 592 **Statistical analysis**

593 Multiple comparisons were performed using one-way ANOVA with post-hoc two-tailed  
594 Student's t-tests between experimentally matched control and mutant samples. Two-  
595 tailed Student's t-tests were used to compare two conditions. \* $p=0.05-0.01$ , \*\* $p=0.01-$   
596  $0.001$ , \*\*\* $p=0.0001-0.001$ , \*\*\*\* $p<0.0001$ , n.s.=not significant. Errors bars indicate  
597 standard deviation.

598 **Acknowledgements**

599 We thank Yuh Nung Jan (University of California, San Francisco, CA) for generously  
600 supporting the initial stages of this research. We thank Drs. Yongqing Zhang and Shan  
601 Jin for katanin-60 reagents, the Developmental Studies Hybridoma Bank (created by the  
602 NICHD of the NIH and maintained at The University of Iowa, Department of Biology,  
603 Iowa City, IA 52242) for anti-Futsch 22C10 antibody, the Bloomington Drosophila Stock  
604 Center (NIH P40 OD018537) for stocks, Kevin Eliceiri and the Laboratory for Optical  
605 and Computational Instrumentation for image analysis support, and the Wickens lab for  
606 sharing reagents. We thank Jay Parrish (University of Washington), Melissa Gardner  
607 (University of Minnesota), and Wildonger lab members for discussions and comments  
608 on the manuscript.

609

610

611 **Competing interests**

612 The authors declare no competing or financial interests.

613

614

615 **Author Contributions**

616 J.W. and B.V.J. conceived of the project and wrote the manuscript. B.V.J., H.A.J.S.,  
617 H.R., D.M.J.S., and J.W. performed the experiments and completed the data analysis.

618 All authors discussed the results and provided input on manuscript.

619

620

621 **Funding**

622 This work was supported by start-up funds provided by the University of Wisconsin-  
623 Madison and grants from the National Institutes of Neurological Disorders and Stroke,  
624 National Institutes of Health [grant R00NS072252 and R21NS101553] to J.W.

625 **List of Symbols and Abbreviations**

626 PTM: post-translational modification

627 da: dendritic arborization

628 ppk: pickpocket

629 h: hours

630 AEL: after egg laying

631 MAP: microtubule-associated protein

632



## 633 References

- 634 **Akella, J. S., Wloga, D., Kim, J., Starostina, N. G., Lyons-Abbott, S., Morrissette, N.**  
635 **S., Dougan, S. T., Kipreos, E. T. and Gaertig, J.** (2010). MEC-17 is an alpha-  
636 tubulin acetyltransferase. *Nature* **467**, 218-22.
- 637 **Atherton, J., Houdusse, A. and Moores, C.** (2013). MAPping out distribution routes  
638 for kinesin couriers. *Biol Cell* **105**, 465-87.
- 639 **Bechstедt, S., Lu, K. and Brouhard, G. J.** (2014). Doublecortin recognizes the  
640 longitudinal curvature of the microtubule end and lattice. *Curr Biol* **24**, 2366-75.
- 641 **Bobinnec, Y., Marcaillou, C. and Debec, A.** (1999). Microtubule polyglutamylolation in  
642 *Drosophila melanogaster* brain and testis. *Eur J Cell Biol* **78**, 671-4.
- 643 **Bonnet, C., Boucher, D., Lazereg, S., Pedrotti, B., Islam, K., Denoulet, P. and**  
644 **Larcher, J. C.** (2001). Differential binding regulation of microtubule-associated  
645 proteins MAP1A, MAP1B, and MAP2 by tubulin polyglutamylolation. *J Biol Chem*  
646 **276**, 12839-48.
- 647 **Boucher, D., Larcher, J. C., Gros, F. and Denoulet, P.** (1994). Polyglutamylolation of  
648 tubulin as a progressive regulator of in vitro interactions between the  
649 microtubule-associated protein Tau and tubulin. *Biochemistry* **33**, 12471-7.
- 650 **Cai, D., McEwen, D. P., Martens, J. R., Meyhofer, E. and Verhey, K. J.** (2009). Single  
651 molecule imaging reveals differences in microtubule track selection between  
652 Kinesin motors. *PLoS Biol* **7**, e1000216.
- 653 **Chakraborti, S., Natarajan, K., Curiel, J., Janke, C. and Liu, J.** (2016). The emerging  
654 role of the tubulin code: From the tubulin molecule to neuronal function and  
655 disease. *Cytoskeleton (Hoboken)* **73**, 521-550.
- 656 **Chauhan, S., Ahmed, Z., Bradfute, S. B., Arko-Mensah, J., Mandell, M. A., Won**  
657 **Choi, S., Kimura, T., Blanchet, F., Waller, A., Mudd, M. H. et al.** (2015).  
658 Pharmaceutical screen identifies novel target processes for activation of  
659 autophagy with a broad translational potential. *Nat Commun* **6**, 8620.
- 660 **Choudhary, C., Kumar, C., Gnad, F., Nielsen, M. L., Rehman, M., Walther, T. C.,**  
661 **Olsen, J. V. and Mann, M.** (2009). Lysine acetylation targets protein complexes  
662 and co-regulates major cellular functions. *Science* **325**, 834-40.
- 663 **Chu, C. W., Hou, F., Zhang, J., Phu, L., Loktev, A. V., Kirkpatrick, D. S., Jackson, P.**  
664 **K., Zhao, Y. and Zou, H.** (2011). A novel acetylation of beta-tubulin by San  
665 modulates microtubule polymerization via down-regulating tubulin incorporation.  
666 *Mol Biol Cell* **22**, 448-56.
- 667 **Conde, C. and Caceres, A.** (2009). Microtubule assembly, organization and dynamics  
668 in axons and dendrites. *Nat Rev Neurosci* **10**, 319-32.
- 669 **Coombes, C., Yamamoto, A., McClellan, M., Reid, T. A., Plooster, M., Luxton, G.**  
670 **W., Alper, J., Howard, J. and Gardner, M. K.** (2016). Mechanism of microtubule  
671 lumen entry for the alpha-tubulin acetyltransferase enzyme alphaTAT1. *Proc Natl*  
672 *Acad Sci U S A* **113**, E7176-E7184.
- 673 **Creppe, C., Malinouskaya, L., Volvert, M. L., Gillard, M., Close, P., Malaise, O.,**  
674 **Laguesse, S., Cornez, I., Rahmouni, S., Ormenese, S. et al.** (2009). Elongator  
675 controls the migration and differentiation of cortical neurons through acetylation  
676 of alpha-tubulin. *Cell* **136**, 551-64.

- 677 **Cueva, J. G., Hsin, J., Huang, K. C. and Goodman, M. B.** (2012). Posttranslational  
678 acetylation of alpha-tubulin constrains protofilament number in native  
679 microtubules. *Curr Biol* **22**, 1066-74.
- 680 **Dompierre, J. P., Godin, J. D., Charrin, B. C., Cordelieres, F. P., King, S. J.,**  
681 **Humbert, S. and Saudou, F.** (2007). Histone deacetylase 6 inhibition  
682 compensates for the transport deficit in Huntington's disease by increasing  
683 tubulin acetylation. *J Neurosci* **27**, 3571-83.
- 684 **Farias, G. G., Guardia, C. M., Britt, D. J., Guo, X. and Bonifacino, J. S.** (2015).  
685 Sorting of Dendritic and Axonal Vesicles at the Pre-axonal Exclusion Zone. *Cell*  
686 *Rep* **13**, 1221-32.
- 687 **Ferreira, T., Ou, Y., Li, S., Giniger, E. and van Meyel, D. J.** (2014). Dendrite  
688 architecture organized by transcriptional control of the F-actin nucleator Spire.  
689 *Development* **141**, 650-60.
- 690 **Grueber, W. B., Jan, L. Y. and Jan, Y. N.** (2002). Tiling of the Drosophila epidermis by  
691 multidendritic sensory neurons. *Development* **129**, 2867-78.
- 692 **Guardia, C. M., Farias, G. G., Jia, R., Pu, J. and Bonifacino, J. S.** (2016). BORC  
693 Functions Upstream of Kinesins 1 and 3 to Coordinate Regional Movement of  
694 Lysosomes along Different Microtubule Tracks. *Cell Rep* **17**, 1950-1961.
- 695 **Hammond, J. W., Huang, C. F., Kaech, S., Jacobson, C., Banker, G. and Verhey, K.**  
696 **J.** (2010). Posttranslational modifications of tubulin and the polarized transport of  
697 kinesin-1 in neurons. *Mol Biol Cell* **21**, 572-83.
- 698 **Horton, A. C. and Ehlers, M. D.** (2003). Dual modes of endoplasmic reticulum-to-Golgi  
699 transport in dendrites revealed by live-cell imaging. *J Neurosci* **23**, 6188-99.
- 700 **Horton, A. C., Racz, B., Monson, E. E., Lin, A. L., Weinberg, R. J. and Ehlers, M. D.**  
701 (2005). Polarized secretory trafficking directs cargo for asymmetric dendrite  
702 growth and morphogenesis. *Neuron* **48**, 757-71.
- 703 **Howes, S. C., Alushin, G. M., Shida, T., Nachury, M. V. and Nogales, E.** (2014).  
704 Effects of tubulin acetylation and tubulin acetyltransferase binding on microtubule  
705 structure. *Mol Biol Cell* **25**, 257-66.
- 706 **Huang, J., Zhou, W., Dong, W., Watson, A. M. and Hong, Y.** (2009). From the Cover:  
707 Directed, efficient, and versatile modifications of the Drosophila genome by  
708 genomic engineering. *Proc Natl Acad Sci U S A* **106**, 8284-9.
- 709 **Hubbert, C., Guardiola, A., Shao, R., Kawaguchi, Y., Ito, A., Nixon, A., Yoshida, M.,**  
710 **Wang, X. F. and Yao, T. P.** (2002). HDAC6 is a microtubule-associated  
711 deacetylase. *Nature* **417**, 455-8.
- 712 **Hummel, T., Krukkert, K., Roos, J., Davis, G. and Klambt, C.** (2000). Drosophila  
713 Futsch/22C10 is a MAP1B-like protein required for dendritic and axonal  
714 development. *Neuron* **26**, 357-70.
- 715 **Ikegami, K., Heier, R. L., Taruishi, M., Takagi, H., Mukai, M., Shimma, S., Taira, S.,**  
716 **Hatanaka, K., Morone, N., Yao, I. et al.** (2007). Loss of alpha-tubulin  
717 polyglutamylation in ROSA22 mice is associated with abnormal targeting of  
718 KIF1A and modulated synaptic function. *Proc Natl Acad Sci U S A* **104**, 3213-8.
- 719 **Janke, C.** (2014). The tubulin code: molecular components, readout mechanisms, and  
720 functions. *J Cell Biol* **206**, 461-72.

- 721 **Jinushi-Nakao, S., Arvind, R., Amikura, R., Kinameri, E., Liu, A. W. and Moore, A.**  
722 **W.** (2007). Knot/Collier and cut control different aspects of dendrite cytoskeleton  
723 and synergize to define final arbor shape. *Neuron* **56**, 963-78.
- 724 **Kalebic, N., Sorrentino, S., Perlas, E., Bolasco, G., Martinez, C. and Heppenstall,**  
725 **P. A.** (2013). alphaTAT1 is the major alpha-tubulin acetyltransferase in mice. *Nat*  
726 *Commun* **4**, 1962.
- 727 **Kaul, N., Soppina, V. and Verhey, K. J.** (2014). Effects of alpha-tubulin K40  
728 acetylation and detyrosination on kinesin-1 motility in a purified system. *Biophys*  
729 *J* **106**, 2636-43.
- 730 **Kim, G. W., Li, L., Gorbani, M., You, L. and Yang, X. J.** (2013). Mice lacking alpha-  
731 tubulin acetyltransferase 1 are viable but display alpha-tubulin acetylation  
732 deficiency and dentate gyrus distortion. *J Biol Chem* **288**, 20334-50.
- 733 **L'Hernault, S. W. and Rosenbaum, J. L.** (1983). Chlamydomonas alpha-tubulin is  
734 posttranslationally modified in the flagella during flagellar assembly. *J Cell Biol*  
735 **97**, 258-63.
- 736 **L'Hernault, S. W. and Rosenbaum, J. L.** (1985). Chlamydomonas alpha-tubulin is  
737 posttranslationally modified by acetylation on the epsilon-amino group of a lysine.  
738 *Biochemistry* **24**, 473-8.
- 739 **Lacroix, B., van Dijk, J., Gold, N. D., Guizetti, J., Aldrian-Herrada, G., Rogowski,**  
740 **K., Gerlich, D. W. and Janke, C.** (2010). Tubulin polyglutamylation stimulates  
741 spastin-mediated microtubule severing. *J Cell Biol* **189**, 945-54.
- 742 **Larcher, J. C., Boucher, D., Lazereg, S., Gros, F. and Denoulet, P.** (1996).  
743 Interaction of kinesin motor domains with alpha- and beta-tubulin subunits at a  
744 tau-independent binding site. Regulation by polyglutamylation. *J Biol Chem* **271**,  
745 22117-24.
- 746 **Lee, A., Li, W., Xu, K., Bogert, B. A., Su, K. and Gao, F. B.** (2003). Control of  
747 dendritic development by the Drosophila fragile X-related gene involves the small  
748 GTPase Rac1. *Development* **130**, 5543-52.
- 749 **Lee, J., Peng, Y., Lin, W. Y. and Parrish, J. Z.** (2015). Coordinate control of terminal  
750 dendrite patterning and dynamics by the membrane protein Raw. *Development*  
751 **142**, 162-73.
- 752 **Li, L., Wei, D., Wang, Q., Pan, J., Liu, R., Zhang, X. and Bao, L.** (2012). MEC-17  
753 deficiency leads to reduced alpha-tubulin acetylation and impaired migration of  
754 cortical neurons. *J Neurosci* **32**, 12673-83.
- 755 **Liu, N., Xiong, Y., Li, S., Ren, Y., He, Q., Gao, S., Zhou, J. and Shui, W.** (2015a).  
756 New HDAC6-mediated deacetylation sites of tubulin in the mouse brain identified  
757 by quantitative mass spectrometry. *Sci Rep* **5**, 16869.
- 758 **Liu, N., Xiong, Y., Ren, Y., Zhang, L., He, X., Wang, X., Liu, M., Li, D., Shui, W. and**  
759 **Zhou, J.** (2015b). Proteomic Profiling and Functional Characterization of Multiple  
760 Post-Translational Modifications of Tubulin. *J Proteome Res* **14**, 3292-304.
- 761 **Ly, N., Elkhatib, N., Bresteau, E., Pietrement, O., Khaled, M., Magiera, M. M.,**  
762 **Janke, C., Le Cam, E., Rutenberg, A. D. and Montagnac, G.** (2016).  
763 alphaTAT1 controls longitudinal spreading of acetylation marks from open  
764 microtubules extremities. *Sci Rep* **6**, 35624.
- 765 **Mao, C. X., Wen, X., Jin, S. and Zhang, Y. Q.** (2017). Increased acetylation of  
766 microtubules rescues human tau-induced microtubule defects and

- 767 neuromuscular junction abnormalities in *Drosophila*. *Dis Model Mech* **10**, 1245-  
768 1252.
- 769 **Mao, C. X., Xiong, Y., Xiong, Z., Wang, Q., Zhang, Y. Q. and Jin, S.** (2014).  
770 Microtubule-severing protein Katanin regulates neuromuscular junction  
771 development and dendritic elaboration in *Drosophila*. *Development* **141**, 1064-74.
- 772 **Maruta, H., Greer, K. and Rosenbaum, J. L.** (1986). The acetylation of alpha-tubulin  
773 and its relationship to the assembly and disassembly of microtubules. *J Cell Biol*  
774 **103**, 571-9.
- 775 **Matthews, K. A. and Kaufman, T. C.** (1987). Developmental consequences of  
776 mutations in the 84B alpha-tubulin gene of *Drosophila melanogaster*. *Dev Biol*  
777 **119**, 100-14.
- 778 **Matthews, K. A., Miller, D. F. and Kaufman, T. C.** (1989). Developmental distribution  
779 of RNA and protein products of the *Drosophila* alpha-tubulin gene family. *Dev*  
780 *Biol* **132**, 45-61.
- 781 **McKenney, R. J., Huynh, W., Vale, R. D. and Sirajuddin, M.** (2016). Tyrosination of  
782 alpha-tubulin controls the initiation of processive dynein-dynactin motility. *EMBO*  
783 *J* **35**, 1175-85.
- 784 **Morley, S. J., Qi, Y., Iovino, L., Andolfi, L., Guo, D., Kalebic, N., Castaldi, L.,  
785 Tischer, C., Portulano, C., Bolasco, G. et al.** (2016). Acetylated tubulin is  
786 essential for touch sensation in mice. *Elife* **5**.
- 787 **Neumann, B. and Hilliard, M. A.** (2014). Loss of MEC-17 leads to microtubule  
788 instability and axonal degeneration. *Cell Rep* **6**, 93-103.
- 789 **Nirschl, J. J., Magiera, M. M., Lazarus, J. E., Janke, C. and Holzbaur, E. L.** (2016).  
790 alpha-Tubulin Tyrosination and CLIP-170 Phosphorylation Regulate the Initiation  
791 of Dynein-Driven Transport in Neurons. *Cell Rep* **14**, 2637-52.
- 792 **Ori-McKenney, K. M., Jan, L. Y. and Jan, Y. N.** (2012). Golgi outposts shape dendrite  
793 morphology by functioning as sites of acentrosomal microtubule nucleation in  
794 neurons. *Neuron* **76**, 921-30.
- 795 **Palazzo, A., Ackerman, B. and Gundersen, G. G.** (2003). Cell biology: Tubulin  
796 acetylation and cell motility. *Nature* **421**, 230.
- 797 **Park, I. Y., Powell, R. T., Tripathi, D. N., Dere, R., Ho, T. H., Blasius, T. L., Chiang,  
798 Y. C., Davis, I. J., Fahey, C. C., Hacker, K. E. et al.** (2016). Dual Chromatin and  
799 Cytoskeletal Remodeling by SETD2. *Cell* **166**, 950-62.
- 800 **Parrish, J. Z., Xu, P., Kim, C. C., Jan, L. Y. and Jan, Y. N.** (2009). The microRNA  
801 bantam functions in epithelial cells to regulate scaling growth of dendrite arbors  
802 in *Drosophila* sensory neurons. *Neuron* **63**, 788-802.
- 803 **Piperno, G. and Fuller, M. T.** (1985). Monoclonal antibodies specific for an acetylated  
804 form of alpha-tubulin recognize the antigen in cilia and flagella from a variety of  
805 organisms. *J Cell Biol* **101**, 2085-94.
- 806 **Piperno, G., LeDizet, M. and Chang, X. J.** (1987). Microtubules containing acetylated  
807 alpha-tubulin in mammalian cells in culture. *J Cell Biol* **104**, 289-302.
- 808 **Portran, D., Schaedel, L., Xu, Z., They, M. and Nachury, M. V.** (2017). Tubulin  
809 acetylation protects long-lived microtubules against mechanical ageing. *Nat Cell*  
810 *Biol* **19**, 391-398.
- 811 **Raff, E. C.** (1984). Genetics of microtubule systems. *J Cell Biol* **99**, 1-10.

- 812 **Reed, N. A., Cai, D., Blasius, T. L., Jih, G. T., Meyhofer, E., Gaertig, J. and Verhey,**  
813 **K. J.** (2006). Microtubule acetylation promotes kinesin-1 binding and transport.  
814 *Curr Biol* **16**, 2166-72.
- 815 **Roll-Mecak, A.** (2015). Intrinsically disordered tubulin tails: complex tuners of  
816 microtubule functions? *Semin Cell Dev Biol* **37**, 11-9.
- 817 **Rolls, M. M., Satoh, D., Clyne, P. J., Henner, A. L., Uemura, T. and Doe, C. Q.**  
818 (2007). Polarity and intracellular compartmentalization of Drosophila neurons.  
819 *Neural Dev* **2**, 7.
- 820 **Schwenk, B. M., Lang, C. M., Hognl, S., Tahirovic, S., Orozco, D., Rentzsch, K.,**  
821 **Lichtenthaler, S. F., Hoogenraad, C. C., Capell, A., Haass, C. et al.** (2014).  
822 The FTLD risk factor TMEM106B and MAP6 control dendritic trafficking of  
823 lysosomes. *EMBO J* **33**, 450-67.
- 824 **Sears, J. C. and Broihier, H. T.** (2016). FoxO regulates microtubule dynamics and  
825 polarity to promote dendrite branching in Drosophila sensory neurons. *Dev Biol*  
826 **418**, 40-54.
- 827 **Shida, T., Cueva, J. G., Xu, Z., Goodman, M. B. and Nachury, M. V.** (2010). The  
828 major alpha-tubulin K40 acetyltransferase alphaTAT1 promotes rapid  
829 ciliogenesis and efficient mechanosensation. *Proc Natl Acad Sci U S A* **107**,  
830 21517-22.
- 831 **Sirajuddin, M., Rice, L. M. and Vale, R. D.** (2014). Regulation of microtubule motors  
832 by tubulin isoforms and post-translational modifications. *Nat Cell Biol* **16**, 335-44.
- 833 **Soba, P., Han, C., Zheng, Y., Perea, D., Miguel-Aliaga, I., Jan, L. Y. and Jan, Y. N.**  
834 (2015). The Ret receptor regulates sensory neuron dendrite growth and integrin  
835 mediated adhesion. *Elife* **4**.
- 836 **Song, Y. and Brady, S. T.** (2015). Post-translational modifications of tubulin: pathways  
837 to functional diversity of microtubules. *Trends Cell Biol* **25**, 125-36.
- 838 **Soppina, V., Herbstman, J. F., Skiniotis, G. and Verhey, K. J.** (2012). Luminal  
839 localization of alpha-tubulin K40 acetylation by cryo-EM analysis of fab-labeled  
840 microtubules. *PLoS One* **7**, e48204.
- 841 **Stephan, R., Goellner, B., Moreno, E., Frank, C. A., Hugenschmidt, T., Genoud, C.,**  
842 **Aberle, H. and Pielage, J.** (2015). Hierarchical microtubule organization controls  
843 axon caliber and transport and determines synaptic structure and stability. *Dev*  
844 *Cell* **33**, 5-21.
- 845 **Stewart, A., Tsubouchi, A., Rolls, M. M., Tracey, W. D. and Sherwood, N. T.** (2012).  
846 Katanin p60-like1 promotes microtubule growth and terminal dendrite stability in  
847 the larval class IV sensory neurons of Drosophila. *J Neurosci* **32**, 11631-42.
- 848 **Sudo, H. and Baas, P. W.** (2010). Acetylation of microtubules influences their  
849 sensitivity to severing by katanin in neurons and fibroblasts. *J Neurosci* **30**, 7215-  
850 26.
- 851 **Szyk, A., Deaconescu, A. M., Spector, J., Goodman, B., Valenstein, M. L.,**  
852 **Ziolkowska, N. E., Kormendi, V., Grigorieff, N. and Roll-Mecak, A.** (2014).  
853 Molecular basis for age-dependent microtubule acetylation by tubulin  
854 acetyltransferase. *Cell* **157**, 1405-15.
- 855 **Tapia, M., Wandosell, F. and Garrido, J. J.** (2010). Impaired function of HDAC6 slows  
856 down axonal growth and interferes with axon initial segment development. *PLoS*  
857 *One* **5**, e12908.

- 858 **Topalidou, I., Keller, C., Kalebic, N., Nguyen, K. C., Somhegyi, H., Politi, K. A.,**  
859 **Heppenstall, P., Hall, D. H. and Chalfie, M.** (2012). Genetically separable  
860 functions of the MEC-17 tubulin acetyltransferase affect microtubule  
861 organization. *Curr Biol* **22**, 1057-65.
- 862 **Tsushima, H., Emanuele, M., Polenghi, A., Esposito, A., Vassalli, M., Barberis, A.,**  
863 **Difato, F. and Chieriegatti, E.** (2015). HDAC6 and RhoA are novel players in  
864 Abeta-driven disruption of neuronal polarity. *Nat Commun* **6**, 7781.
- 865 **Valenstein, M. L. and Roll-Mecak, A.** (2016). Graded Control of Microtubule Severing  
866 by Tubulin Glutamylation. *Cell* **164**, 911-21.
- 867 **Valenzuela-Fernandez, A., Cabrero, J. R., Serrador, J. M. and Sanchez-Madrid, F.**  
868 (2008). HDAC6: a key regulator of cytoskeleton, cell migration and cell-cell  
869 interactions. *Trends Cell Biol* **18**, 291-7.
- 870 **Walter, W. J., Beranek, V., Fischermeier, E. and Diez, S.** (2012). Tubulin acetylation  
871 alone does not affect kinesin-1 velocity and run length in vitro. *PLoS One* **7**,  
872 e42218.
- 873 **Wang, Z. and Sheetz, M. P.** (2000). The C-terminus of tubulin increases cytoplasmic  
874 dynein and kinesin processivity. *Biophys J* **78**, 1955-64.
- 875 **Warn, R. M., Harrison, A., Planques, V., Robert-Nicoud, N. and Wehland, J.** (1990).  
876 Distribution of microtubules containing post-translationally modified alpha-tubulin  
877 during Drosophila embryogenesis. *Cell Motil Cytoskeleton* **17**, 34-45.
- 878 **Webster, D. R. and Borisy, G. G.** (1989). Microtubules are acetylated in domains that  
879 turn over slowly. *J Cell Sci* **92 ( Pt 1)**, 57-65.
- 880 **Wilson, P. J. and Forer, A.** (1997). Effects of nanomolar taxol on crane-fly  
881 spermatocyte spindles indicate that acetylation of kinetochore microtubules can  
882 be used as a marker of poleward tubulin flux. *Cell Motil Cytoskeleton* **37**, 20-32.
- 883 **Witte, H., Neukirchen, D. and Bradke, F.** (2008). Microtubule stabilization specifies  
884 initial neuronal polarization. *J Cell Biol* **180**, 619-32.
- 885 **Wolf, N., Regan, C. L. and Fuller, M. T.** (1988). Temporal and spatial pattern of  
886 differences in microtubule behaviour during Drosophila embryogenesis revealed  
887 by distribution of a tubulin isoform. *Development* **102**, 311-24.
- 888 **Xie, R., Nguyen, S., McKeehan, W. L. and Liu, L.** (2010). Acetylated microtubules are  
889 required for fusion of autophagosomes with lysosomes. *BMC Cell Biol* **11**, 89.
- 890 **Xiong, X., Xu, D., Yang, Z., Huang, H. and Cui, X.** (2013). A single amino-acid  
891 substitution at lysine 40 of an Arabidopsis thaliana alpha-tubulin causes extensive  
892 cell proliferation and expansion defects. *J Integr Plant Biol* **55**, 209-20.
- 893 **Xu, Z., Schaedel, L., Portran, D., Aguilar, A., Gaillard, J., Marinkovich, M. P., They,**  
894 **M. and Nachury, M. V.** (2017). Microtubules acquire resistance from mechanical  
895 breakage through intraluminal acetylation. *Science* **356**, 328-332.
- 896 **Yalgin, C., Ebrahimi, S., Delandre, C., Yoong, L. F., Akimoto, S., Tran, H., Amikura,**  
897 **R., Spokony, R., Torben-Nielsen, B., White, K. P. et al.** (2015). Centrosomin  
898 represses dendrite branching by orienting microtubule nucleation. *Nat Neurosci*  
899 **18**, 1437-45.
- 900 **Ye, B., Zhang, Y., Song, W., Younger, S. H., Jan, L. Y. and Jan, Y. N.** (2007).  
901 Growing dendrites and axons differ in their reliance on the secretory pathway.  
902 *Cell* **130**, 717-29.

903 **Zhang, Y., Kwon, S., Yamaguchi, T., Cubizolles, F., Rousseaux, S., Kneissel, M.,**  
904 **Cao, C., Li, N., Cheng, H. L., Chua, K. et al. (2008).** Mice lacking histone  
905 deacetylase 6 have hyperacetylated tubulin but are viable and develop normally.  
906 *Mol Cell Biol* **28**, 1688-701.  
907 **Zhang, Y., Ma, C., Delohery, T., Nasipak, B., Foat, B. C., Bounoutas, A.,**  
908 **Bussemaker, H. J., Kim, S. K. and Chalfie, M. (2002).** Identification of genes  
909 expressed in *C. elegans* touch receptor neurons. *Nature* **418**, 331-5.

910

911

## 912 Figure legends

913 **Fig. 1. *In vivo* analysis of  $\alpha$ -tubulin modifications.** (A) Cartoon showing  $\alpha$ -tubulin  
914 modifications (left) and sequence alignment of the C-terminal tails of human, mouse, fly,  
915 and worm Tuba1a orthologs (right). Red: ten amino acids in  $\alpha$ Tub84B <sup>$\Delta$ C</sup>. Underline:  
916 three residues (EEY) deleted in  $\alpha$ Tub84B <sup>$\Delta$ 3</sup>. (B-D) Microtubules in developing fly  
917 embryos are modified and da neuron axons are enriched in acetylated microtubules (D-  
918 D"). Embryos were stained for HRP (green), a neuronal membrane marker, as well as  
919 polyglutamylated (magenta, B) acetylated (red, C and D), and tyrosinated (blue, C and  
920 D) microtubules. Scale bars: 100  $\mu$ m (B) and 10  $\mu$ m (D). Arrowheads: da neuron cluster;  
921 arrows: axons. (E-F) In larval da neurons, microtubules in axons and dendrites are  
922 acetylated at equivalent levels. The acetylated microtubule signal in proximal axonal  
923 and dendritic segments were compared as a ratio (mean  $\pm$  SD), n = 7 class IV ddaC  
924 neurons. Green: acetylated microtubules and magenta: HRP. Scale bar: 50  $\mu$ m.  
925 Arrowheads: dendrite and ddaC cell body marker; arrow: axons. Images from fixed  
926 tissue. (G) Cartoon of the  $\alpha$ Tub84B<sup>KO-attP</sup> allele that enables rapid knock-in of designer  
927 alleles to interrogate  $\alpha$ -tubulin function *in vivo*. Top: wild-type  $\alpha$ Tub84B (blue), middle:  
928 the major coding exon of  $\alpha$ Tub84B was deleted (brackets) and replaced by an attP site  
929 (yellow), bottom: knock-in of a mutant  $\alpha$ Tub84B (orange). (H) GFP-tagged  $\alpha$ Tub84B is  
930 broadly expressed in developing larvae. In muscles and epithelial cells, a filamentous  
931 pattern indicates GFP:: $\alpha$ Tub84B is likely incorporated into microtubules. Scale bars: 25  
932  $\mu$ m (left) and 10  $\mu$ m (muscle and epithelial cell images, right). Arrowheads: dendrite;  
933 arrow: axon. Green: GFP, magenta: CD4::Tomato. Images from live 3<sup>rd</sup> instar larvae. (I)  
934 Western blot analysis (left) and quantification (right) of  $\alpha$ -tubulin levels (normalized to  
935 actin) in mutant strains as indicated. All strains are homozygous. K40A 84DKO refers to  
936  $\alpha$ Tub84B<sup>K40A</sup> chromosome with  $\alpha$ Tub84D deleted ( $\alpha$ Tub84B<sup>K40A</sup>,  $\alpha$ Tub84D<sup>KO</sup>). (J)  
937 Western blot of lysates from wild-type and  $\alpha$ Tub84B mutant fly heads probed for  
938 acetylated, tyrosinated, and polyglutamylated  $\alpha$ -tubulin, as indicated. The two-lane blot  
939 (right) was probed for acetylated  $\alpha$ -tubulin includes lysate from double-mutant  
940  $\alpha$ Tub84B<sup>K40A</sup>  $\alpha$ Tub84D<sup>KO</sup> fly heads. The  $\alpha$ Tub84B  $\Delta$ 3 mutation eliminates both the anti-  
941 tyrosinated and anti-polyglutamylated  $\alpha$ -tubulin signals.



942 **Fig. 2. The  $\alpha$ Tub84B K40A mutation does not affect the polarized distribution of**  
943 **Golgi outposts, but does affect lysosome motility in dendrites.** (A-B''') Golgi  
944 outposts, marked by ManII::GFP (green), localize to dendrites in both control (A-A''') and  
945  $\alpha$ Tub84B<sup>K40A</sup> neurons (B-B'''). ManII::GFP (green in A and B, black in A', A''', B', and B''')  
946 and CD4::Tomato (magenta in A and B, black in A'' and B'') are expressed in class IV  
947 da neurons under the control of the *ppk* enhancer. Bracket: axon, arrowheads: Golgi  
948 outposts in dendrites. Scale bar: 25  $\mu$ m. (C) Representative kymographs of lysosome  
949 dynamics in the dendrites of control (top) and  $\alpha$ Tub84B<sup>K40A</sup> (bottom) neurons. Scale bar  
950 x-axis: 10  $\mu$ m, scale bar y-axis: 10 sec. Lysosomes are marked by Lamp1::GFP. Cell  
951 body is to the right. (D,E) In dendrites (D), lysosomes traveling retrograde in  
952  $\alpha$ Tub84B<sup>K40A</sup> neurons display increased flux (top) and reduced velocity (bottom).  
953 Lysosome motility in axons (E) is unaffected by the  $\alpha$ Tub84B K40A mutation. Dendrites  
954 (D, flux): 30 wild-type control dendrite segments and 29  $\alpha$ Tub84B<sup>K40A</sup> dendrite  
955 segments were analyzed (mean  $\pm$  SD);  $p=0.008$ . Dendrites (D, velocity): 32 wild-type  
956 control dendrite segments and 29  $\alpha$ Tub84B<sup>K40A</sup> dendrite segments were analyzed  
957 (mean  $\pm$  SD);  $p=0.012$ . Axons (E, flux): 7 wild-type control axons and 5  $\alpha$ Tub84B<sup>K40A</sup>  
958 axons were analyzed (mean  $\pm$  SD). Axons (E, velocity): 7 wild-type control axons and 5  
959  $\alpha$ Tub84B<sup>K40A</sup> axons were analyzed (mean  $\pm$  SD). Statistical significance was evaluated  
960 using a two-tailed Student's t-test. \*\* $p=0.001-0.01$ , \* $p=0.01-0.05$ , n.s. = not significant.

961 **Fig. 3. Sensory dendrite tip number is increased in  $\alpha$ Tub84B K40 mutant neurons.**

962 (A) In class IV da neuron dendrites, acetylated microtubules are present in main  
963 dendrite branches and some terminal dendrites (arrowheads). Red: HRP, neuronal  
964 membrane marker, green: anti-acetylated  $\alpha$ -tubulin. Scale bar: 10  $\mu$ m. (B-E) Mutations  
965 that prevent  $\alpha$ Tub84B K40 acetylation (K40A, K40R) increase the number of dendrite  
966 tips at 120 h AEL. Terminal branch number is not significantly affected at 48 h AEL.  
967 Quadrant of class IV da neuron dendrite arbor at 120 h AEL illuminated with *ppk-*  
968 *CD4::GFP* (B,C). Scale bar: 50  $\mu$ m. Experiments to analyze the morphogenesis of each  
969 mutant included age-matched controls that were imaged and analyzed in parallel. The  
970 numbers of dendrite tips in control neurons do not significantly differ between each  
971 other.  $\alpha$ Tub84B<sup>K40A</sup> dendrite analysis (D): 6 wild-type control and 6  $\alpha$ Tub84B<sup>K40A</sup>  
972 neurons were analyzed (mean  $\pm$  SD),  $p=0.001$ .  $\alpha$ Tub84B<sup>K40R</sup> dendrite analysis (E): 8  
973 wild-type control and 14  $\alpha$ Tub84B<sup>K40R</sup> neurons were analyzed (mean  $\pm$  SD),  $p=0.04$ .  
974 Statistical significance was evaluated using one-way ANOVA with post hoc two-tailed  
975 Student's t-tests between experimentally matched control and mutant neurons.  
976 \*\* $p=0.001-0.01$ , \* $p=0.01-0.05$ , n.s. = not significant.

977

978 **Fig. 4. Terminal-dendrite extension is increased in  $\alpha Tub84B^{K40A}$  neurons.** (A)  
979 Overlaid photographs of a dendrite imaged at two time points 15 minutes apart in  
980 control (left) and  $\alpha Tub84B^{K40A}$  (right) larvae at 48 h AEL. The initial dendrite image (t=0)  
981 is pseudo-colored red and the second image (t=15 min) is shown in green. Dendrites  
982 that have retracted will appear red and those that have extended will appear green.  
983 Scale bar: 10  $\mu$ m. (B,C) Percentage of the total number of terminal branches that  
984 extended (B) or retracted (C) during the 15 min imaging interval in wild-type control,  
985  $\alpha Tub84B^{K40A}$ , and  $\alpha Tub84B^{K40R}$  neurons. Boxes represent first and third quartiles  
986 (median indicated by line) and whiskers indicate minimum and maximum values. (D)  
987 Percentage of the dynamic terminal branches (mean  $\pm$  SD) that either extended (dark  
988 bar) or retracted (light bar). Experiments included age-matched controls that were  
989 imaged and analyzed in parallel; all dendrites in the entire arbor of each neuron were  
990 analyzed. Dendrite dynamics between control neurons are not significantly different.  
991  $\alpha Tub84B^{K40A}$  dendrite analysis (B-D): 12 wild-type control and 8  $\alpha Tub84B^{K40A}$  neurons  
992 were analyzed, p=0.002 (% total dendrites that extended), p=0.014 (% dynamic  
993 dendrites that extended or retracted).  $\alpha Tub84B^{K40R}$  dendrite analysis (B-D): 11 wild-type  
994 control and 8  $\alpha Tub84B^{K40R}$  neurons were analyzed. Statistical significance was  
995 evaluated using one-way ANOVA with post hoc two-tailed Student's t-tests between  
996 experimentally matched control and mutant neurons. \*\*\*p=0.0001-0.001, \*\*p=0.001-  
997 0.01, \*p=0.01-0.05, n.s. = not significant.

998 **Fig. 5. Reduced microtubule growth frequency in dendrites of  $\alpha Tub84B^{K40A}$**   
999 **neurons.** (A) In a terminal dendrite (box, left panel), EB1::GFP (arrowhead, right  
1000 panels) marks a microtubule growing towards the dendrite tip in a  $\alpha Tub84B^{K40A}$  neuron.  
1001 Scale bars: 10  $\mu m$  (left panel) and 2  $\mu m$  (right panels). (B,C) Microtubule polymerization  
1002 frequency, quantified as the number of EB1::GFP comets per  $\mu m$  per minute, is  
1003 significantly decreased in dendrites (B), not axons (C), of  $\alpha Tub84B^{K40A}$  neurons. Boxes  
1004 represent first and third quartiles (median indicated by line) and whiskers indicate  
1005 minimum and maximum values. Experiments included age-matched controls that were  
1006 imaged and analyzed in parallel. EB1::GFP analysis: 27 wild-type control and 30  
1007  $\alpha Tub84B^{K40A}$  dendrites were analyzed (B),  $p=0.003$ ; 6 wild-type control and 6  
1008  $\alpha Tub84B^{K40A}$  axons were analyzed (C). Statistical significance was evaluated using a  
1009 two-tailed Student's t-test. \*\* $p=0.001-0.01$ , \* $p=0.01-0.05$ , n.s. = not significant.

1010 **Fig. 6. Futsch levels are decreased in  $\alpha$ Tub84B K40A mutant dendrites. (A)**  
1011 Representative images of a quadrant of da neuron dendrite arbors immunostained for  
1012 CD4::GFP (left panel, green) and Futsch (middle panel, red). Top row: wild-type control,  
1013 bottom row:  $\alpha$ Tub84B<sup>K40A</sup>. Scale bar: 50  $\mu$ m. (B) Quantification of Futsch levels in wild-  
1014 type control and  $\alpha$ Tub84B<sup>K40A</sup> neurons (mean  $\pm$  SD). Futsch levels measured along a  
1015 dendrite (0-100% length, top) and proximal axon (bottom) were normalized to  
1016 CD4::GFP levels. (C-E) In hemizygous Futsch mutant animals (D), the number of  
1017 dendrite tips are increased relative to wild-type control neurons (C,E). Scale bar: 50  $\mu$ m.  
1018 Experiments included age-matched controls that were imaged and analyzed in parallel.  
1019  $\alpha$ Tub84B<sup>K40A</sup> Futsch analysis (B, upper panel): 27 wild-type control and 45  $\alpha$ Tub84B<sup>K40A</sup>  
1020 dendrites were analyzed, p=0.002 (0-20%), p=0.00004 (20-40%), p=0.001 (40-60%); 12  
1021 wild-type control and 18  $\alpha$ Tub84B<sup>K40A</sup> axons were analyzed (B, lower panel), no  
1022 significant difference was detected at any 0.1  $\mu$ m interval. Futsch loss-of-function  
1023 dendrite tip analysis (mean  $\pm$  SD, panel E): 4 wild-type control and 8 *futsch*<sup>K68</sup> neurons  
1024 were analyzed in 3<sup>rd</sup> instar male larvae, p=0.01. Statistical significance was evaluated  
1025 using a two-tailed Student's t-test. \*\*\*\*p<0.0001, \*\*p=0.001-0.01, n.s. = not significant.

1026 **Supplemental Fig. 1. Dendrite branching is similar between neurons over-**  
1027 **expressing katanin-60 in wild-type and  $\alpha$ Tub84B K40A animals.** (A-C) Dendrite tip  
1028 number is not significantly different between neurons over-expressing *katanin-60* in a  
1029 wild-type versus  *$\alpha$ Tub84B<sup>K40A</sup>* background. Scale bar: 100  $\mu$ m. Experiments included  
1030 age-matched controls that were imaged and analyzed in parallel. Dendrite tip analysis:  
1031 9 neurons over-expressing *katanin-60* in a wild-type background and 7 neurons over-  
1032 expressing *katanin-60* in a  *$\alpha$ Tub84B<sup>K40A</sup>* mutant background were analyzed (mean  $\pm$   
1033 SD). Statistical significance was evaluated using a two-tailed Student's t-test. n.s. = not  
1034 significant.

1035 **Table 1. Effects of  $\alpha$ -tubulin mutations on survival.**

| <i><math>\alpha</math>-tubulin alleles</i>                                                  | Description of mutation                                                                              | Effect on survival  |
|---------------------------------------------------------------------------------------------|------------------------------------------------------------------------------------------------------|---------------------|
| <i><math>\alpha</math>Tub84B<sup>KO</sup></i>                                               | deletes <i><math>\alpha</math>Tub84B</i>                                                             | lethal              |
| <i><math>\alpha</math>Tub84B<sup>K'in-WT</sup></i>                                          | knock-in wild-type <i><math>\alpha</math>Tub84B</i>                                                  | viable              |
| <i>GFP::<math>\alpha</math>Tub84B</i>                                                       | knock-in GFP-tagged wild-type <i><math>\alpha</math>Tub84B</i>                                       | lethal*             |
| <i><math>\alpha</math>Tub84B<sup>ΔC</sup></i>                                               | last 10 aa of C-terminal tail (CTT) deleted                                                          | lethal*             |
| <i><math>\alpha</math>Tub84B<sup>Tuba1a-tail</sup></i>                                      | fly CTT replaced by vertebrate CTT                                                                   | viable              |
| <i><math>\alpha</math>Tub84B<sup>Δ3</sup></i>                                               | last 3 aa of CTT deleted, blocks (de)tyrosination                                                    | viable              |
| <i><math>\alpha</math>Tub84B<sup>AAAA</sup></i>                                             | 4 glutamates in CTT mutated, blocks polyglutamylation and glycylation of CTT                         | viable              |
| <i><math>\alpha</math>Tub84B<sup>K40A</sup></i>                                             | blocks K40 acetylation (charge and length of lysine sidechain not conserved)                         | viable              |
| <i><math>\alpha</math>Tub84B<sup>K40R</sup></i>                                             | blocks K40 acetylation (charge and length of lysine sidechain conserved)                             | viable              |
| <i><math>\alpha</math>Tub84B<sup>K40A</sup>,<br/><math>\alpha</math>Tub84D<sup>KO</sup></i> | blocks <i><math>\alpha</math>Tub84B</i> K40 acetylation and deletes <i><math>\alpha</math>Tub84D</i> | viable <sup>‡</sup> |

1036

1037 \*dominant male sterile and lethal in trans to deletion strains that eliminate  *$\alpha$ Tub84B*.

1038 <sup>‡</sup> *$\alpha$ Tub84B<sup>K40A</sup>*,  *$\alpha$ Tub84D<sup>KO</sup>* is viable in trans to deficiencies that eliminate  *$\alpha$ Tub84D*

1039 (Df(3R)BSC747, Df(3R)ED7665, Df(3R)BSC465) and to a deficiency that removes both

1040  *$\alpha$ Tub84B* and  *$\alpha$ Tub84D* (Df(3R)Antp17).

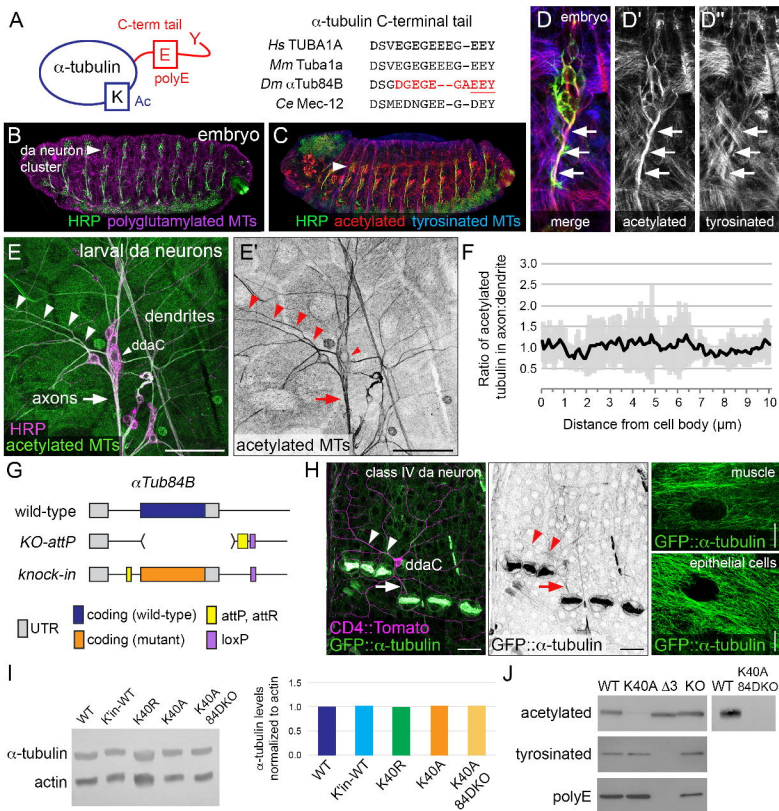

Fig. 1.



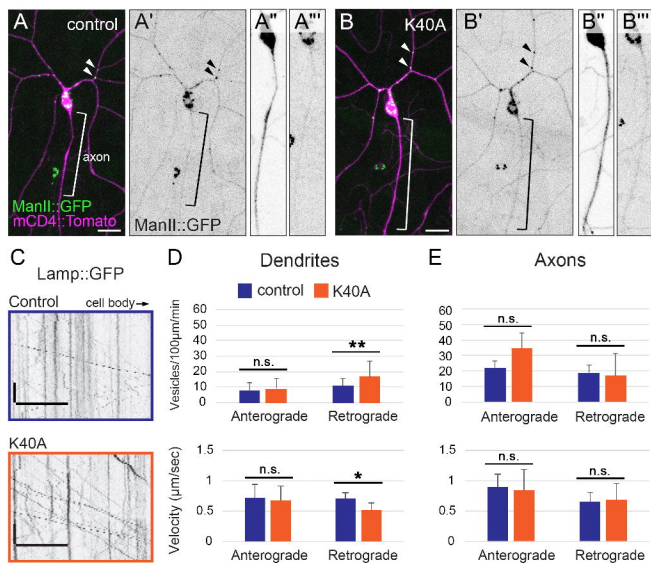

Fig. 2.

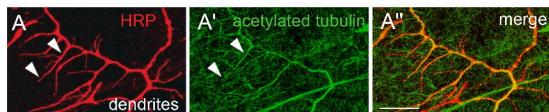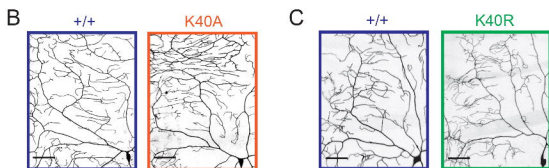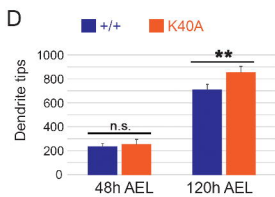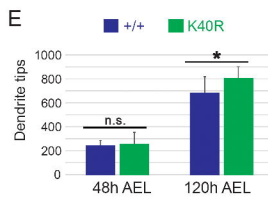

Fig. 3.

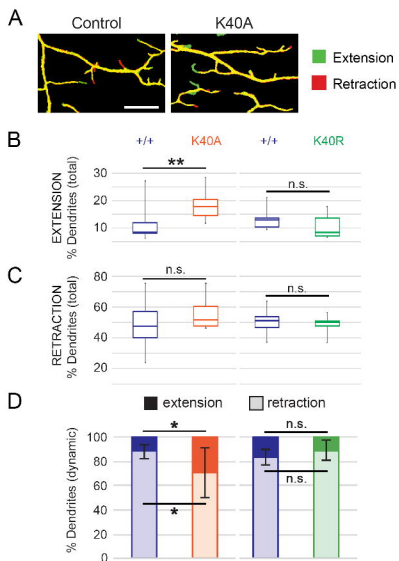

Fig. 4.

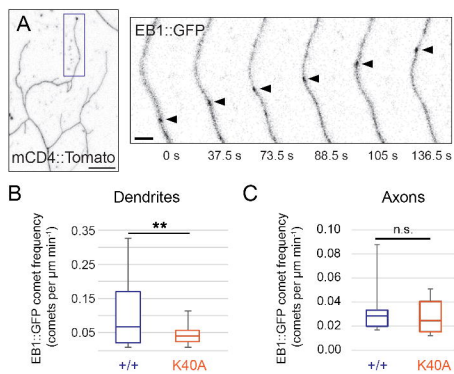

Fig. 5.

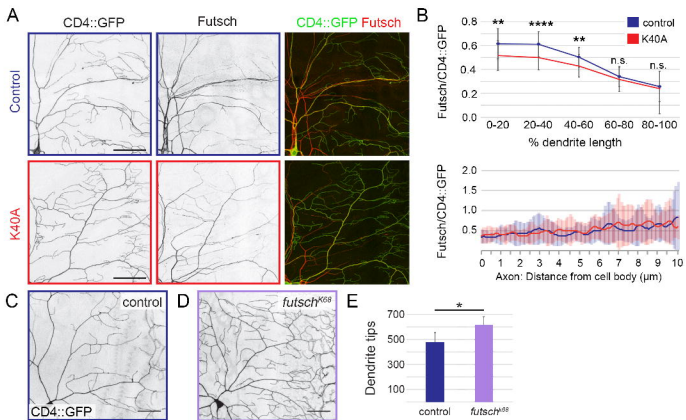

Fig. 6.
